# Supplementary material for: P66SHC deletion improves fertility and progeric phenotype of late‐generation TERC‐deficient mice but not their short lifespan
Source: PubMed Central journal article supplement (PMC4854904; doi:10.1111/acel.12448), 2016-03-10

**Supplementary Figure 1.** Representative FISH images of sections of different organs from G0, G3 and G5 TERC<sup>-/-</sup>-P66SHC<sup>+/+</sup> and TERC<sup>-/-</sup>-p66SHC<sup>-/-</sup> mice, stained with the Cy3 conjugated TelC PNA probe (grayscale panels), the colored panels show Cy3 and DAPI fluorescence pattern in a stained section of WT liver as control.

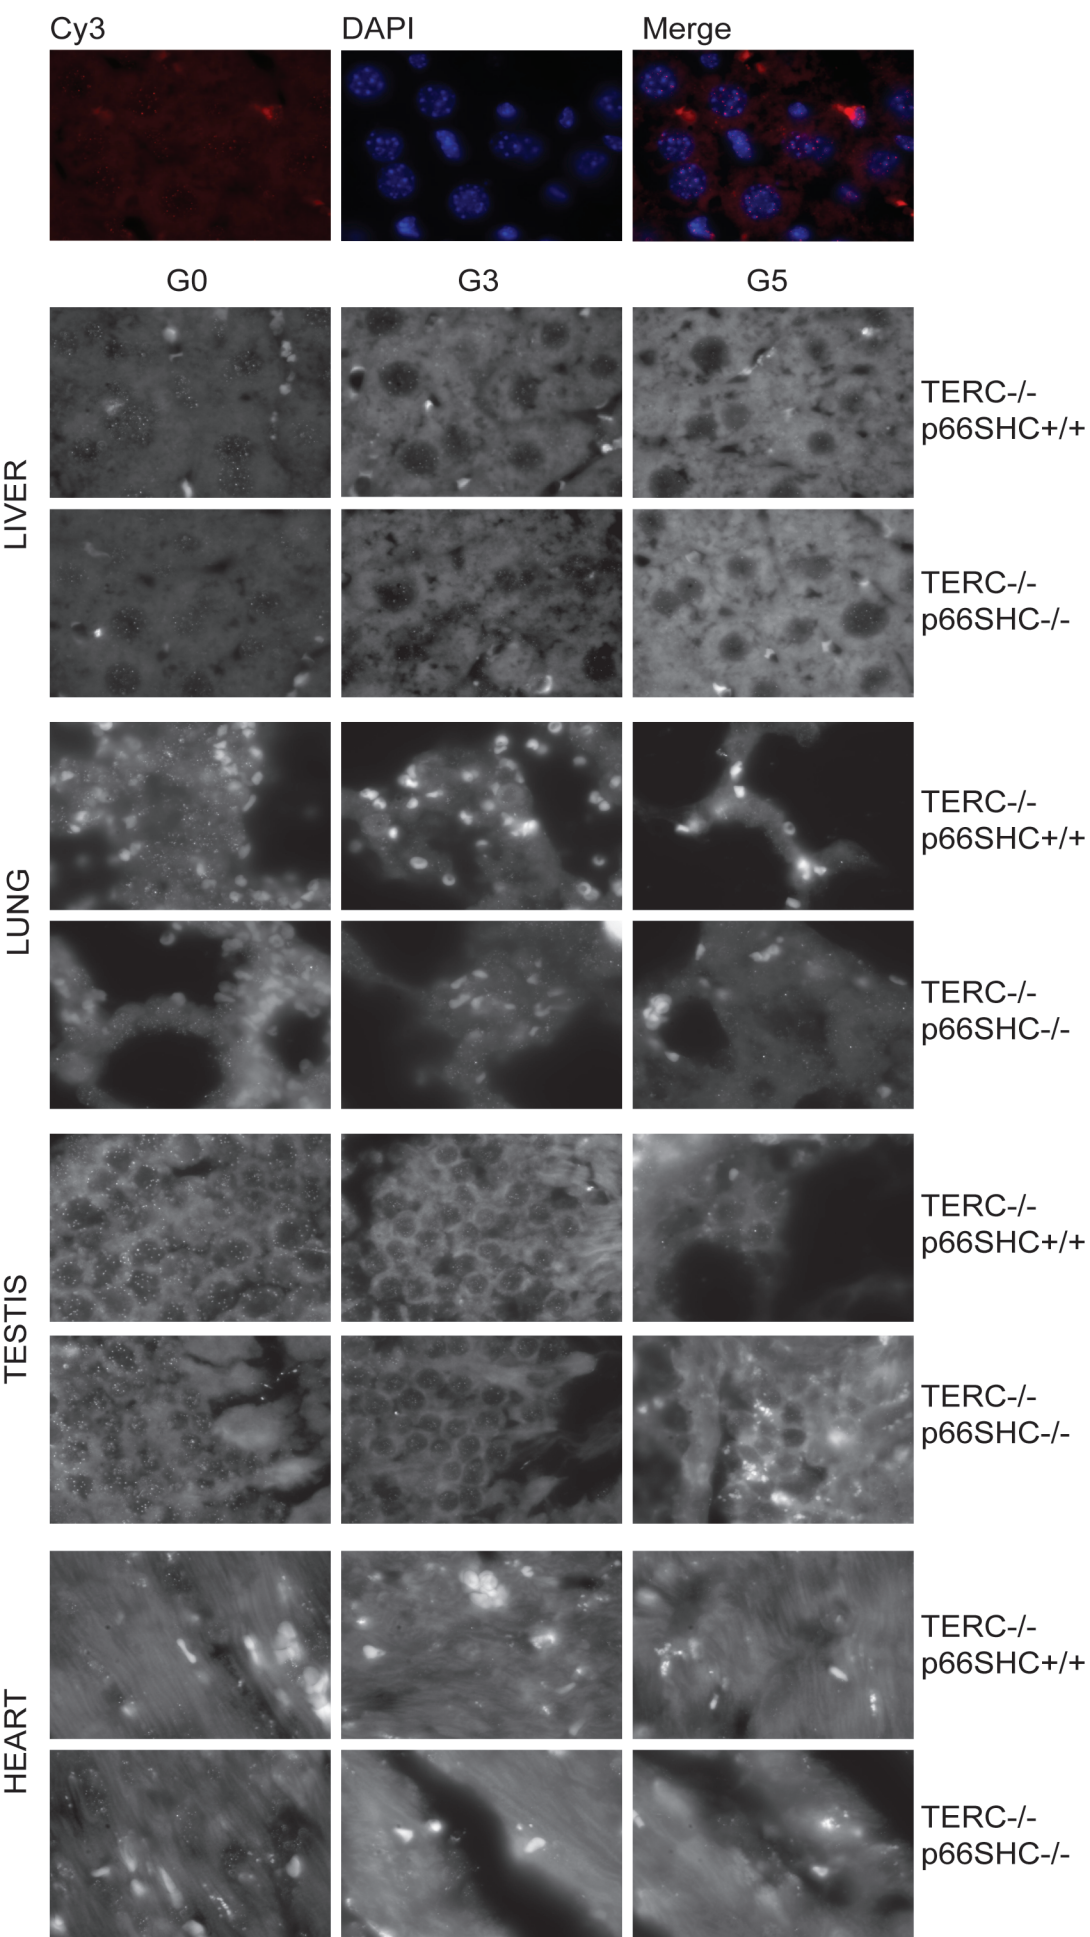

**Supplementary Figure 2.** IHC analysis of testis slices from G3 and G5 TERC<sup>-/-</sup> p66SHC<sup>+/+</sup> and TERC<sup>-/-</sup> p66SHC<sup>-/-</sup> mice with anti-activated caspase 3 antibody. The arrows indicate positive cells.

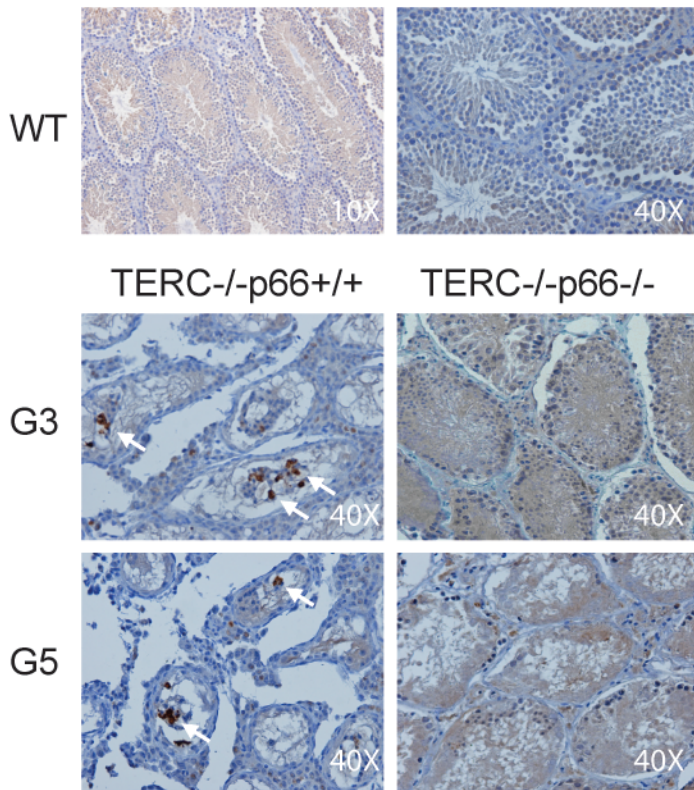

**Supplementary Figure 3.** HE stained sections of quadriceps from G0 and G3 TERC<sup>-/-</sup>-p66SHC<sup>+/+</sup> or p66SHC<sup>-/-</sup> mice

GO TERC<sup>-/-</sup>-P66SHC<sup>+/+</sup>

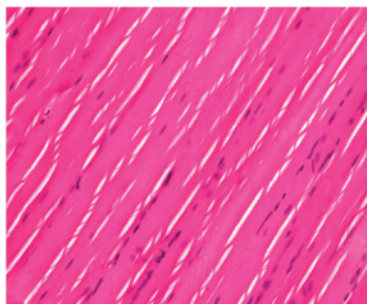

G3 TERC<sup>-/-</sup>-P66SHC<sup>+/+</sup>

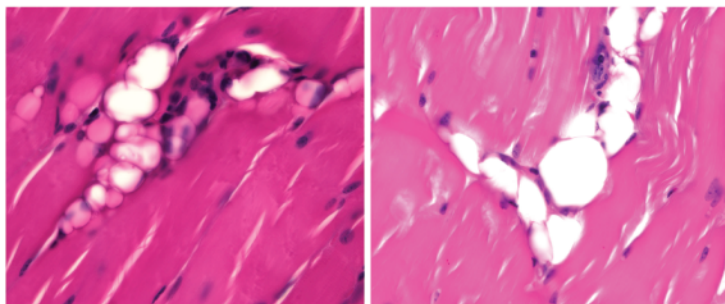

GO TERC<sup>-/-</sup>-P66SHC<sup>-/-</sup>

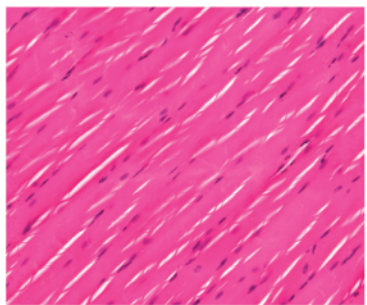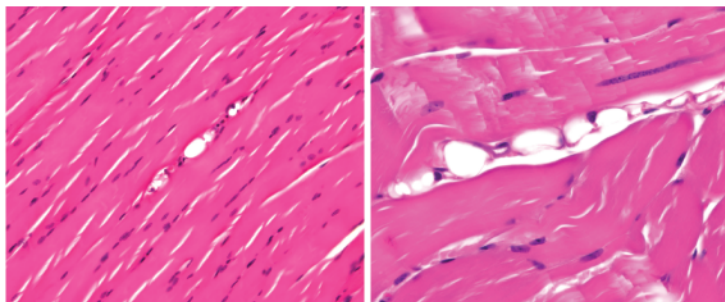

Supplement: ACEL-15-446-s001.pdf [file ACEL-15-446-s001.pdf]
